# Supplementary material
Source: HighWire-hosted journal article supplement (https://ard.bmj.com/highwire/filestream/202542/field_highwire_adjunct_files/6/ARD_wording_135483.docx)

**Supplemental file**

**Wording of function NRS scales**

**FRENCH**

- Patient-reportedfunction NRS = Echelle visuelle numérique (EVN) fonction pour le patient

Entourez le chiffre qui correspond le mieux à la difficulté que vous avez éprouvée pour accomplir vos activités quotidiennes à cause de l’arthrose dans votre articulation à l’étude au cours des dernières 48 heures :

**Extrême**

**Aucune**


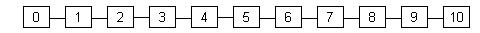


- Physician-reportedfunction NRS = Echelle visuelle numérique (EVN) fonction pour le médecin

Entourez le chiffre qui correspond le mieux à la difficulté que votre patient a éprouvé pour accomplir ses activités quotidiennes à cause de l’arthrose dans son articulation à l’étude au cours des dernières 48 heures :

**Extrême**

**Aucune**


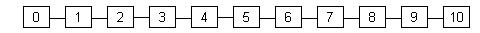


**TRANSLATED TO ENGLISH**

- Patient-reportedfunction NRS

*What is the degree of difficulty you have experienced for the daily activities during the last 48 hours*

*due to your (knee or hip) OA?*

**Extreme**

**None**


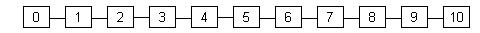


- Physician-reportedfunction NRS

*What is the degree of difficulty your patient have experienced for the daily activities during the last 48 hours*

*due to your (knee or hip) OA*?

**Extreme**

**None**


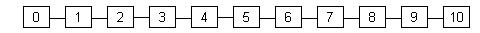

Supplement: ARD_wording_135483.docx [file ARD_wording_135483.docx]
